# Supplementary material for: Employing the Generalized Pareto Distribution to Analyze Extreme Rainfall Events on Consecutive Rainy Days in Thailand's Chi Watershed: Implications for Flood Management
Source: Copernicus journal article supplement (doi:10.5194/hess-2023-167), 2023-07-19
Supplement: Supplementary file [file hess-2023-167-AC2-supplement.pdf]

Dear Reviewer,

Thank you for taking the time to review our manuscript entitled "Employing the Generalized Pareto Distribution to Analyze Extreme Rainfall Events on Consecutive Rainy Days in Thailand's Chi Watershed: Implications for Flood Management". We sincerely appreciate your insightful feedback and are pleased to hear that you found the paper of interesting.

It is encouraging to learn that our derivations are regarded as elegant and correct, and that our explanations, while different from what you might personally prefer, are still deemed appropriate. We have always strived to present our findings in the clearest manner possible while retaining our unique perspective, and your comments reassure us that we've managed to strike a balance.

Your concise summarization of our study, highlighting the practical application of our theoretical results, particularly in the context of flood management and climate change, is very much appreciated. We concur with your sentiment on the significance of preparing for extreme rainfall events, and we're glad that our work resonates with this perspective.

Your recommendation for the acceptance of our manuscript in the journal Hydrology and Earth System Sciences is both encouraging and gratifying. We understand the importance of the review process, and we're thankful for your positive feedback and constructive input.

Once again, thank you for your time and consideration. We look forward to any further instructions or suggestions that may come as we progress through the publication process.

Warm regards,

Piyapatr Busababodhin and Co-authors
